# Supplementary material
Source: PubMed Central journal article supplement (PMC3811580)
Supplement: JB.00751-13_zjb999092880so1.pdf [file JB.00751-13_zjb999092880so1.pdf]

### CRP site upstream of *ainS*

VF1038\_ **CAT**TTTTTACCTTTTTTATGTCGCCTTCACAGCGTCAATTAACCTTCTTATTAATCAA  
GAGGATGAATAGATAATCCTTCACTCTTAATCACTATCAAATCTATGAAGCGTGATTATACAA  
TATTGTTACTAATAAGCGGTAAGAATTTAATCAAATTTAATTTTAAATTTTTGTGCGTAAGACAC  
GCAAAGTACTCATAACACCACTACCTATTTTTACTATACTGATTATGCTGAGAAAGTAATTTCC  
TCAGCAATTTTAAATGACTTATCAATCAATAAGGTAGT **ATTATGAAAACTTCACACTT**CTTTTA  
AATACACTTCCATCTATCTCTCACGAAGAGATAGTCGAAAAAACCTGCAATATGAATTTATA  
AAAGAG **TTG** *ainS*

- Yellow highlight indicates region tested for CRP binding (Figure 5), with key portions of the CRP recognition site in bold
- Green highlight indicates the predicted translational start sites as annotated in Genbank for VF\_1038 (on reverse strand at top) and for *ainS* (which appears to lack a typical ATG start)

### CRP site upstream in intergenic *luxRI* region

LuxR\_ **CAT**TTTTTGTTCACCTAGCTTATTGTTATGTTTTTTCGCTGTTATATAACACCAATTTG  
GAGGTTTGGTGATATCGCTTCCAATT **AATTCGATCTGGGTCACATTT**ATGCATCTTGGTGAAAA  
CGTGGTGTAAACAT **TG**CAGCTGTAGGATGGTACAGGT **TTCCGTAATGCATCAGTTTGTTATGAT**  
CATGT **A**AAATAAGAGAGGTTGC **ATG** *LuxI*

- Yellow highlight indicates region tested for CRP binding (Figure 5), with key portions of the CRP recognition site in bold
- Green highlight indicates the predicted translational start sites as annotated in Genbank for LuxR (on reverse strand at top) and *ainS*
- The blue highlighted “A” denotes the transcriptional start site for *luxI* (1)
- Gray shading covers the “*lux* box” target sequence for LuxR
- Underlined bases indicate the predicted -10 promoter element.
- At the site of the pink highlighting, an A is present between the T and G in strain MJ1 (2)

**Supplemental Figure S1.** Intergenic promoter regions upstream of *ainS* and between *luxR* and *luxI*.

1. **Egland KA, Greenberg EP.** 1999. Quorum sensing in *Vibrio fischeri*: elements of the *luxI* promoter. *Mol. Microbiol.* **31**:1197-1204.
2. **Bose JL, Wollenberg MS, Colton DM, Mandel MJ, Septer AN, Dunn AK, Stabb EV.** 2011. Contribution of rapid evolution of the *luxR-luxI* intergenic region to the diverse bioluminescence outputs of *Vibrio fischeri* strains isolated from different environments. *Appl. Environ. Microbiol.* **77**:2445-2457.
